# Supplementary material for: Prolactin as immune cell regulator inToxocara canissomatic larvae chronic infection
Source: Oxford University Press journal article supplement (doi:10.1042/bsr20180305), 2018-06-19

1 **SUPPLEMENTARY MATERIAL**

2

3 **Prolactin as immune cell regulator in *Toxocara canis* somatic larvae chronic infection.**

4

5 Víctor Hugo Del Río-Araiza<sup>a</sup>, Karen Elizabeth Nava-Castro<sup>b</sup>, Fernando Alba-Hurtado<sup>c</sup>, Andrés  
6 Quintanar-Stephano<sup>d</sup>, Hugo Aguilar-Díaz<sup>e</sup>, Marco Antonio Muñoz-Guzmán<sup>c</sup>, Pedro Ostoa-  
7 Saloma<sup>a</sup>, María Dolores Ponce-Regalado<sup>f</sup> and Jorge Morales-Montor<sup>a\*</sup>

8 <sup>a</sup>Departamento de Inmunología, Instituto de Investigaciones Biomédicas, Universidad Nacional  
9 Autónoma de México, AP 70228, México D.F. 04510, México.

10 <sup>b</sup> Departamento de Genotoxicología, Centro de Ciencias de la Atmósfera, Universidad Nacional  
11 Autónoma de México.

12 <sup>c</sup> Departamento de Ciencias Biológicas, Facultad de Estudios Superiores Cuautitlán,  
13 Universidad Nacional Autónoma de México, México.

14 <sup>d</sup> Centro de Ciencias Básicas, Universidad Autónoma de Aguascalientes. Aguascalientes,  
15 México.

16 <sup>e</sup> Centro Nacional de Investigación Disciplinaria en Parasitología Veterinaria, Instituto Nacional  
17 de Investigaciones Forestales Agrícolas y Pecuarias, INIFAP. Jiutepec, Morelos, México.

18 <sup>f</sup> Universidad de Guadalajara. Centro Universitario de los Altos - Departamento de clínicas.  
19 Carretera a Yahualica, Km. 7.5. Tepatitlán de Morelos, Jalisco, México.

20

21 Jorge Morales-Montor \*Corresponding author: Tel: +5255 56232673; E-mail address:

22 [jmontor66@biomedicas.unam.mx](mailto:jmontor66@biomedicas.unam.mx), [jmontor66@hotmail.com](mailto:jmontor66@hotmail.com)

23

24

25 **Supplementary Figure 1. Cell population analysis.** Immune cell populations were defined  
26 according to the following analysis: Cells were first gated by size and complexity, then we  
27 selected them as T cells (CD3+); B cells (CD45RA+); NK (CD161+) or T $\gamma\delta$  cells (TCR $\gamma\delta$ +). T  
28 cells were then gated as T helper (CD4+) or T cytotoxic (CD8+). In all cases, the percentage  
29 of PRLR+ cells was defined in histograms according to the unspecific staining in each mice of  
30 the secondary antibody used to detect the anti-PRLR.

31 **Supplementary Figure 2. Immune cell 1 subpopulations comparison among**  
32 **experimental groups in the spleen.** Representative dot plots showing the analysis of the  
33 percentage of T helper (CD4+) vs. T cytotoxic (CD8+) cells (upper row); T cells (CD3+) vs. B  
34 cells (CD45RA+) (middle row); and NK (CD161+) vs T $\gamma\delta$  cells (TCR $\gamma\delta$ +) (lower row) in the  
35 spleen of the experimental groups (from left to right): Intact Non-infected (Intact Control);  
36 Intact Infected (Intact Infx); Sham-HPRL Non-infected (Sh-HPRL Ctrl); Sham-HPRL Infected  
37 (Sh-HPRL Infx); HPRL Non-infected (HPRL Ctrl); and HPRL Infected (Sh-HPRL Infx).

38 **Supplementary Figure 3. Immune cell subpopulations comparison among experimental**  
39 **groups in peripheral lymph nodes (PLN).** Representative dot plots showing the analysis  
40 of the percentage of T helper (CD4+) vs. T cytotoxic (CD8+) cells (upper row); T cells (CD3+)  
41 vs. B cells (CD45RA+) (middle row); and NK (CD161+) vs. T $\gamma\delta$  cells (TCR $\gamma\delta$ +) (lower row) in  
42 PLN's of the experimental groups (from left to right): Intact Non-infected (Intact Control); Intact  
43 Infected (Intact Infx); Sham-HPRL Non-infected (Sh-HPRL Ctrl); Sham-HPRL Infected (Sh-  
44 HPRL Infx); HPRL Non-infected (HPRL Ctrl); and HPRL Infected (Sh-HPRL Infx).

45 **Supplementary Figure 4. Immune cell subpopulations comparison among experimental**  
46 **groups in mesenteric lymph nodes (MLN).** Representative dot plots showing the analysis  
47 of the percentage of T helper (CD4+) vs. T cytotoxic (CD8+) cells (upper row); T cells (CD3+)  
48 vs. B cells (CD45RA+) (middle row); and NK (CD161+) vs. T $\gamma\delta$  cells (TCR $\gamma\delta$ +) (lower row) in

49 MLN's of the experimental groups (from left to right): Intact Non-infected (Intact Control);  
50 Intact Infected (Intact Infx); Sham-HPRL Non-infected (Sh-HPRL Ctrl); Sham-HPRL Infected  
51 (Sh-HPRL Infx); HPRL Non-infected 1 (HPRL Ctrl); and HPRL Infected (Sh-HPRL Infx).

52

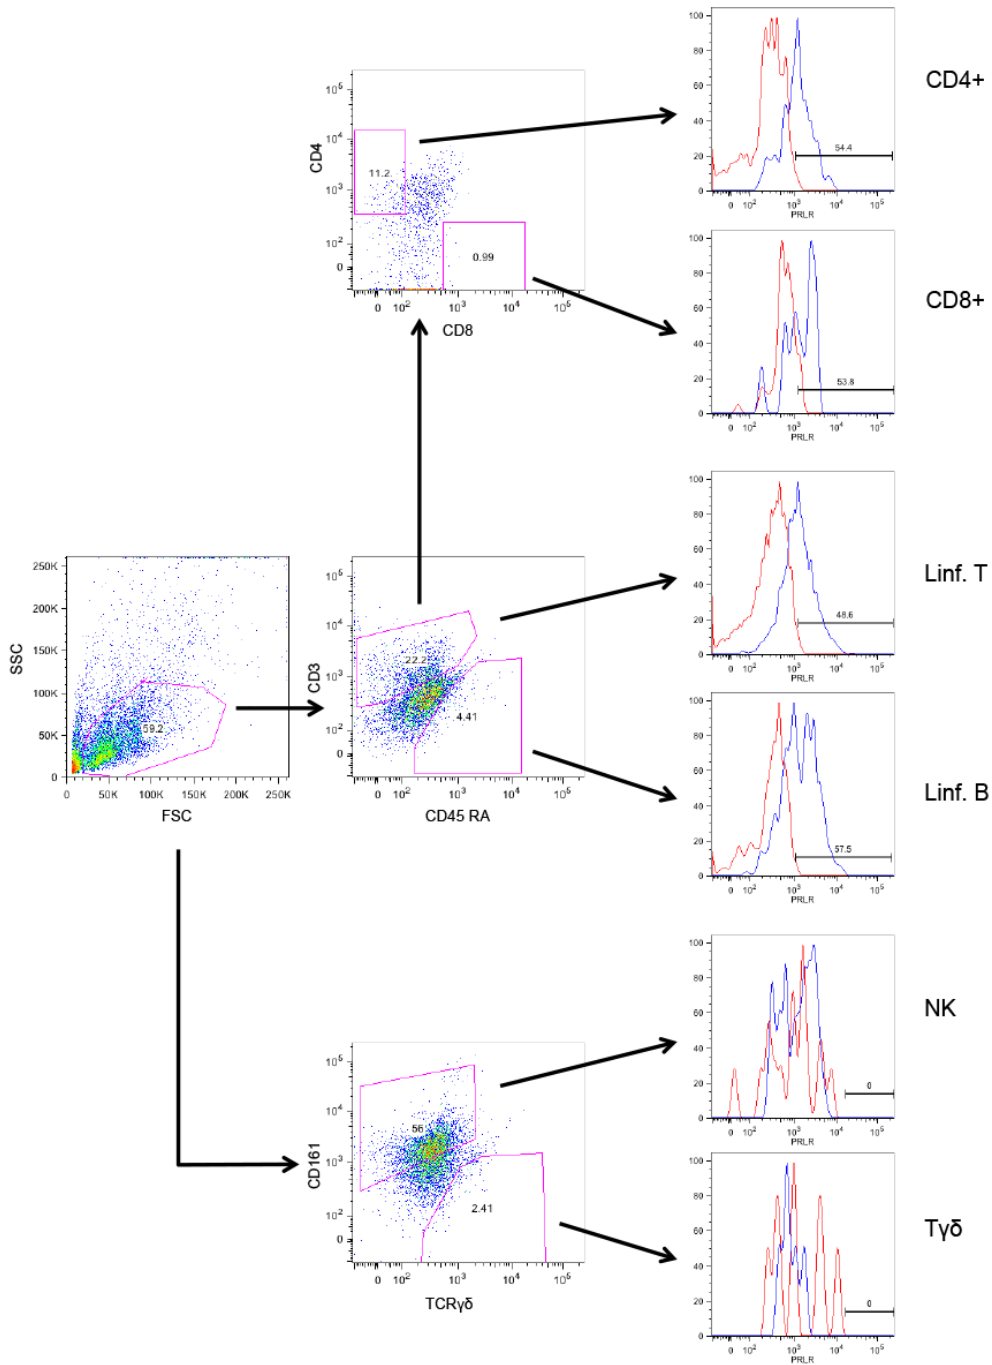

| Intact Ctrl | Intact Infx | Sh-HPRL Ctrl | Sh-HPRL Infx | HPRL Ctrl | HPRL Infx |
|-------------|-------------|--------------|--------------|-----------|-----------|
|-------------|-------------|--------------|--------------|-----------|-----------|

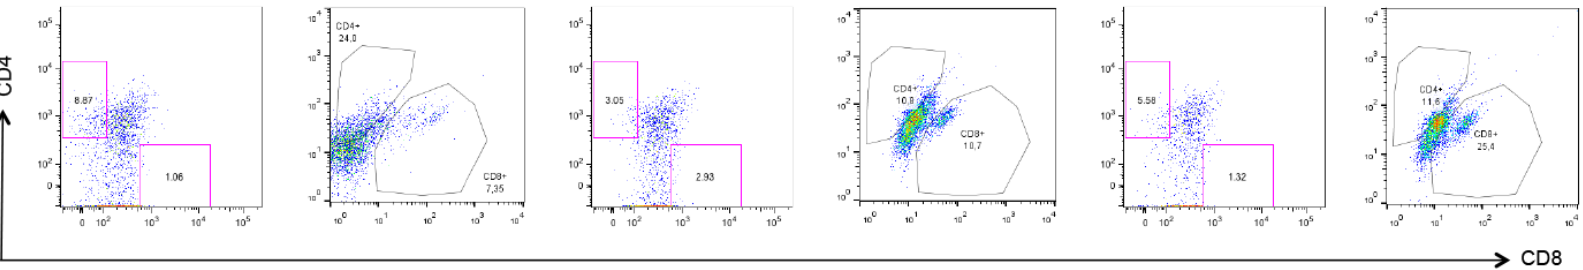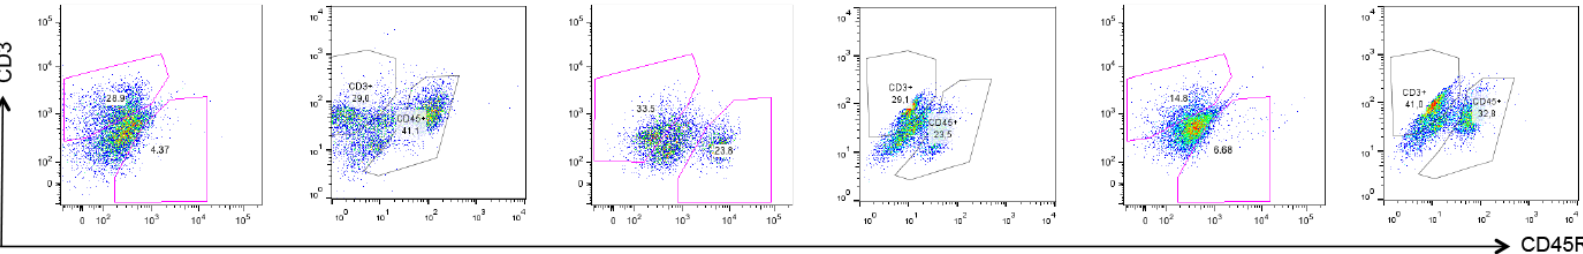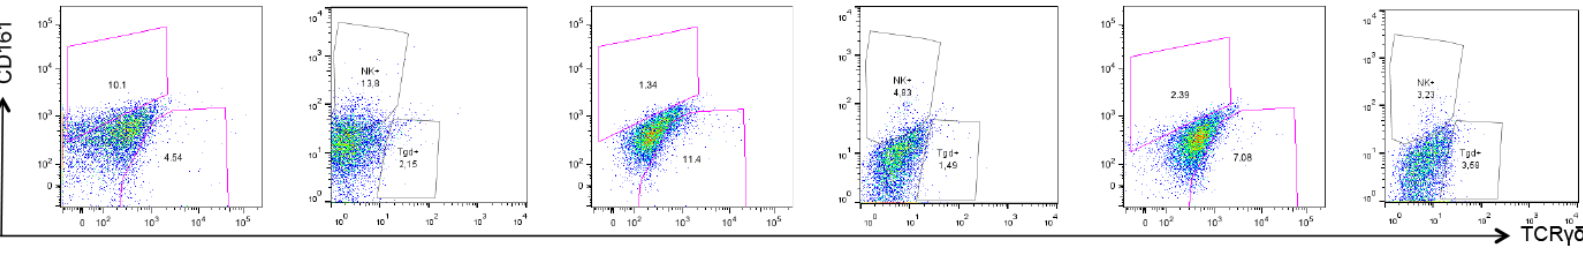

Intact Ctrl      Intact Infx      Sh-HPRL Ctrl      Sh-HPRL Infx      HPRL Ctrl      HPRL Infx

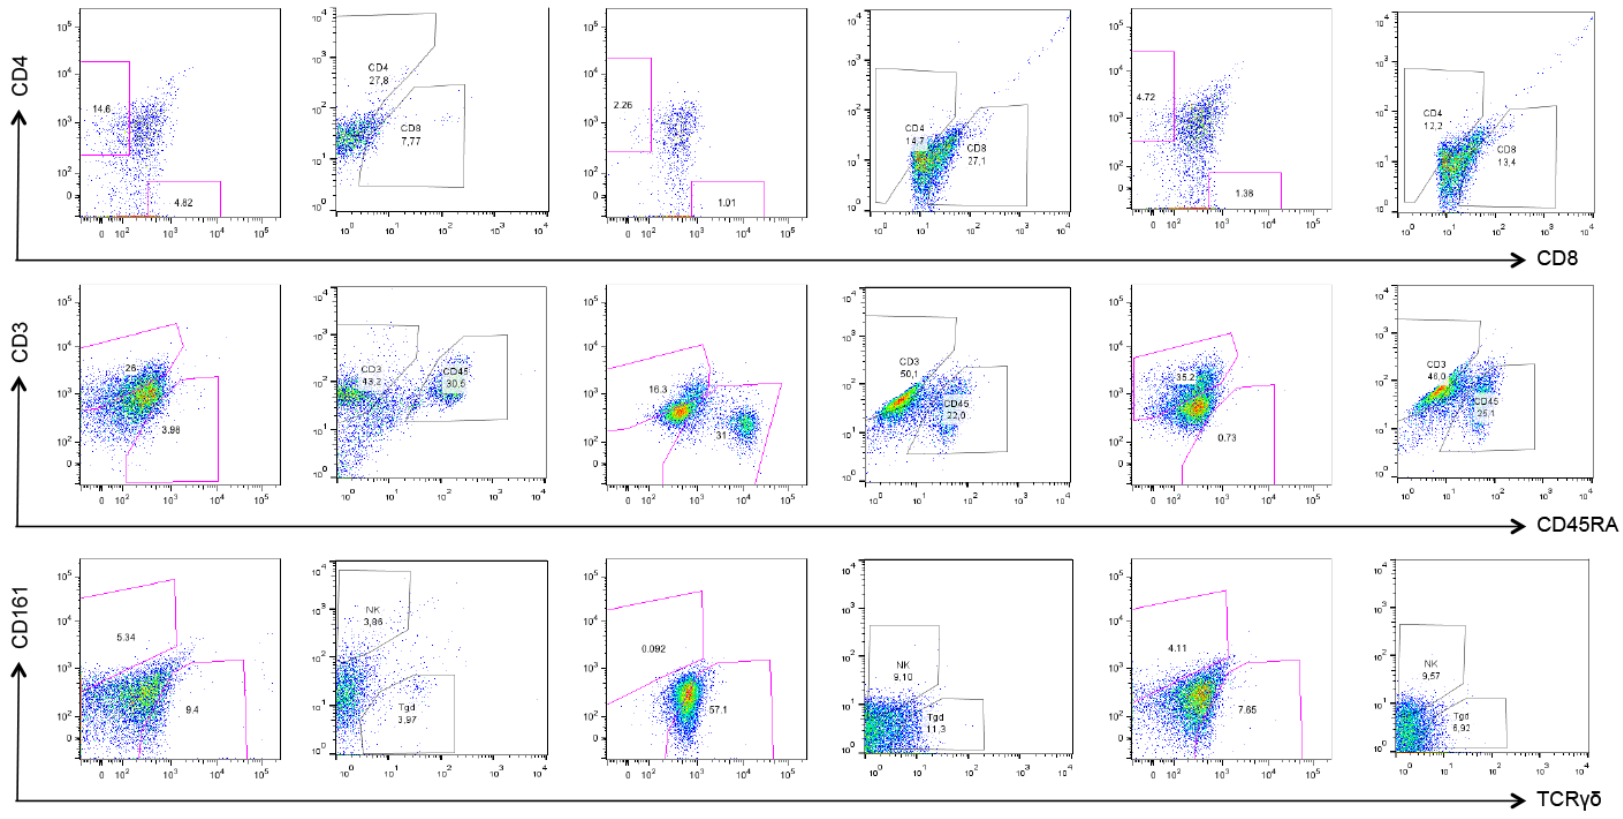

Intact Ctrl      Intact Infx      Sh-HPRL Ctrl      Sh-HPRL Infx      HPRL Ctrl      HPRL Infx

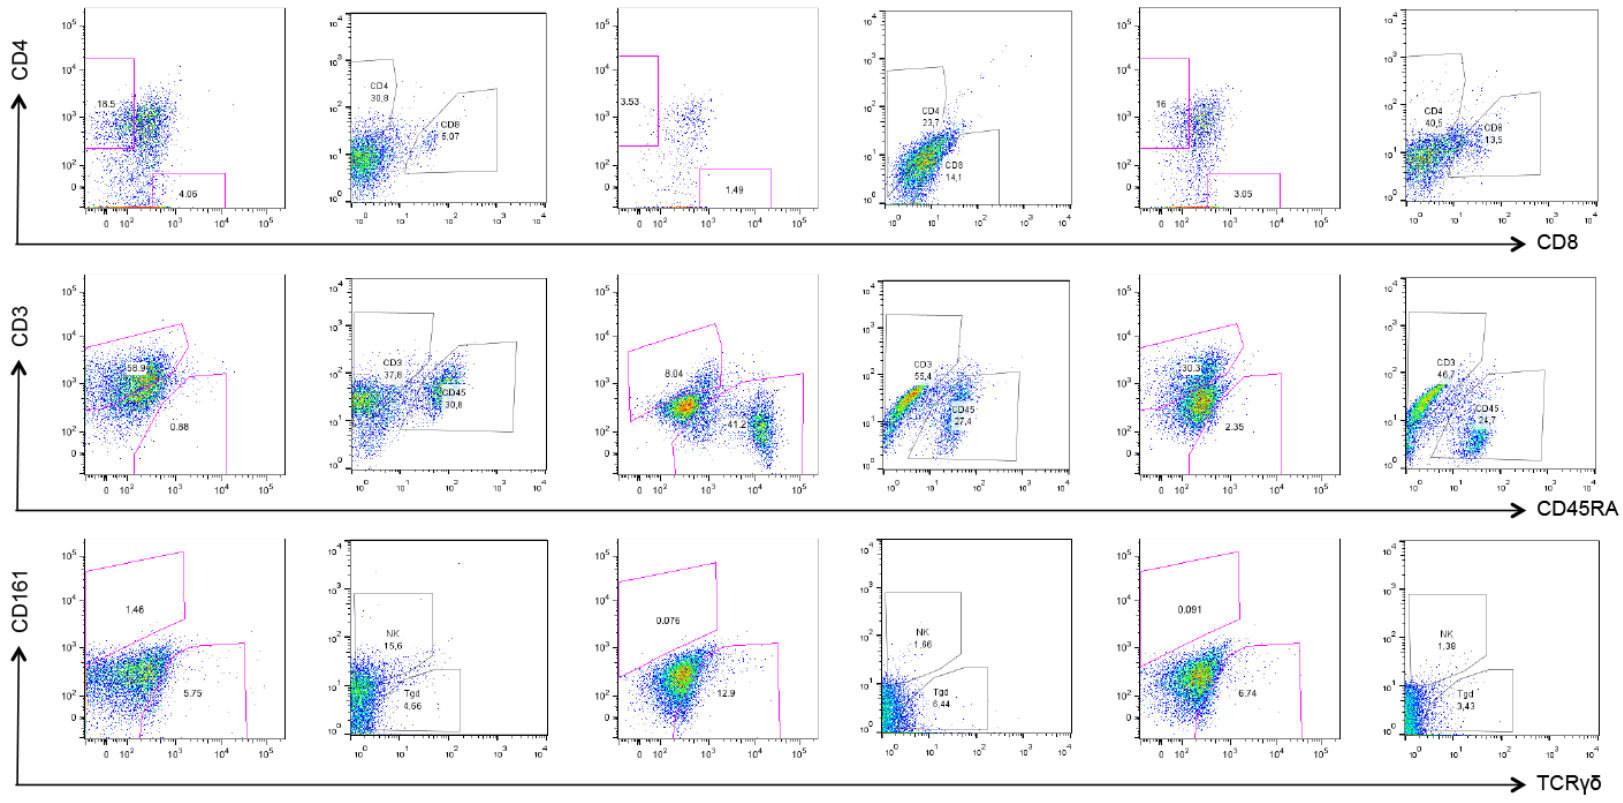

Supplement: bsr20180305_supp1.pdf [file bsr20180305_supp1.pdf]
